# Supplementary material for: Targeting MUC1-C suppresses polycomb repressive complex 1 in multiple myeloma
Source: PubMed Central journal article supplement (PMC5642475; doi:10.18632/oncotarget.20144), 2017-08-10
Supplement: oncotarget-08-69237-s001.pdf [file oncotarget-08-69237-s001.pdf]

## Targeting MUC1-C suppresses polycomb repressive complex 1 in multiple myeloma

### SUPPLEMENTARY MATERIALS

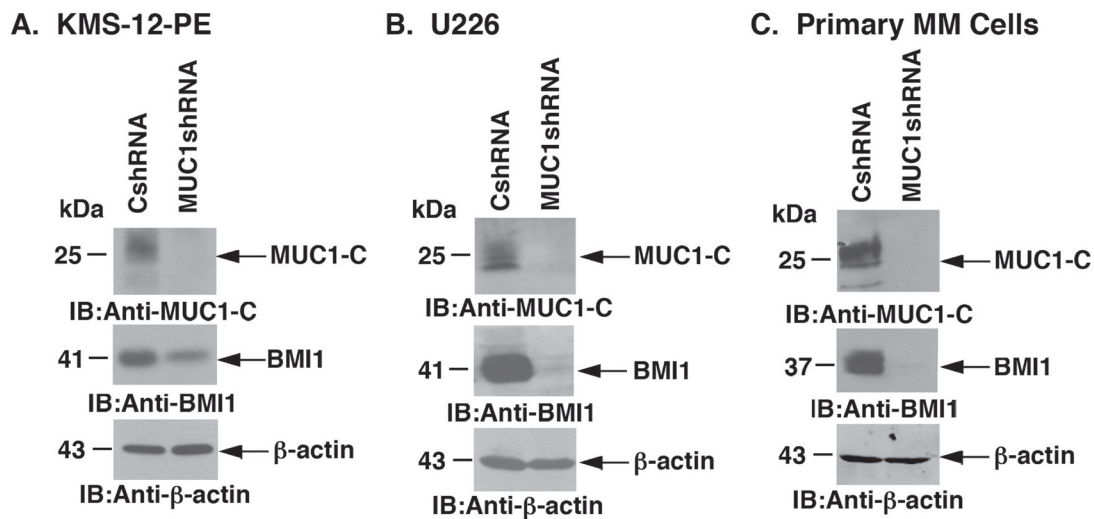

**Supplementary Figure 1: Targeting MUC1-C is associated with the downregulation of BMI1 levels.** (A-C) Lysates from KMS-12-PE (A), U266 (B) and primary MM (C) cells from Patient #2 stably expressing a control shRNA (CshRNA) or a MUC1 shRNA were immunoblotted with the indicated antibodies.

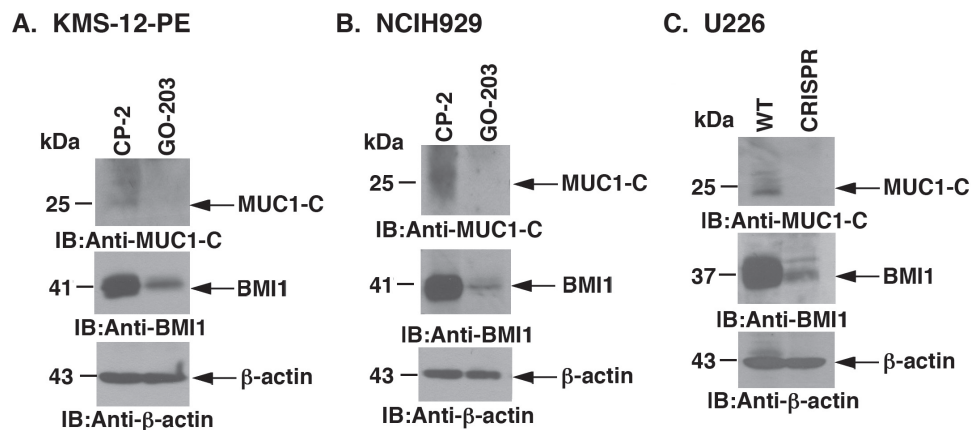

**Supplementary Figure 2: MUC1-C drives BMI1 expression.** (A-B) KMS-12-PE (A) and NCIH929 (B) cells were treated with CP-2 or GO-203 for 48 h. Lysates were immunoblotted with the indicated antibodies. (C) U266 cells were silenced for MUC1 using CRISPR/Cas9 gene editing. Lysates from the parental WT and CRISPR cells were analyzed by immunoblot analysis.

**A. OPM-2**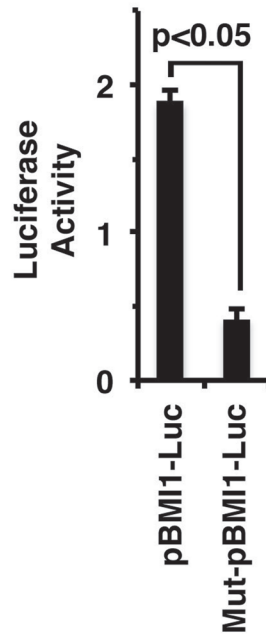**B. OPM-2**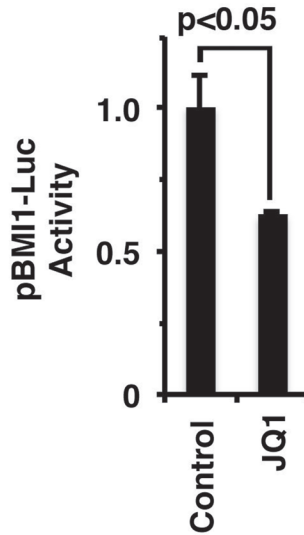**C. OPM-2**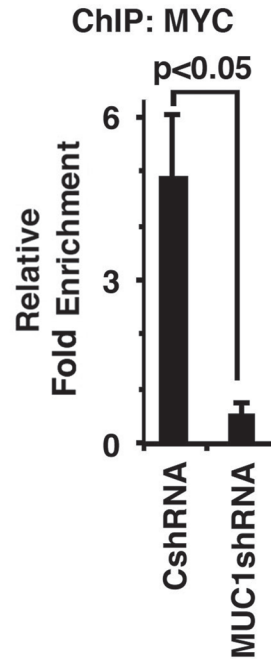

**Supplementary Figure 3: MUC1-C activates BMI1 gene transcription.** (A) OPM-2 cells were transfected with empty pGL3-Luc, the indicated pBMI1-Luc or a mutant Mut-pBMI1-Luc vectors and SV-40-Renilla-Luc. Luciferase activity was measured at 24 h after transfection. The results (mean±SE of 3 determinations) are expressed as the relative luciferase activity compared with that obtained with cells expressing pGL3-Luc. (B) OPM-2 cells were treated with JQ1 or vehicle control for 48 h and then transfected with the pGL3-Luc or pBMI1-Luc and SV-40-Renilla-Luc. Luciferase activity was measured at 24 h after transfection. The results (mean±SE of 3 determinations) are expressed as the relative luciferase activity compared with that obtained with cells expressing pGL3-Luc. (C) Soluble chromatin from the OPM-2/CshRNA and OPM-2/MUC1shRNA cells was precipitated with anti-MYC or a control IgG antibody. The final DNA samples were amplified by qPCR with pairs of primers (Supplemental Table S2) for the MYC binding site in the BMI1 promoter. The results (mean±SE of 3 determinations) are expressed as the relative fold enrichment compared with that obtained for the IgG control (assigned a value of 1).

### A. KMS-12-PE

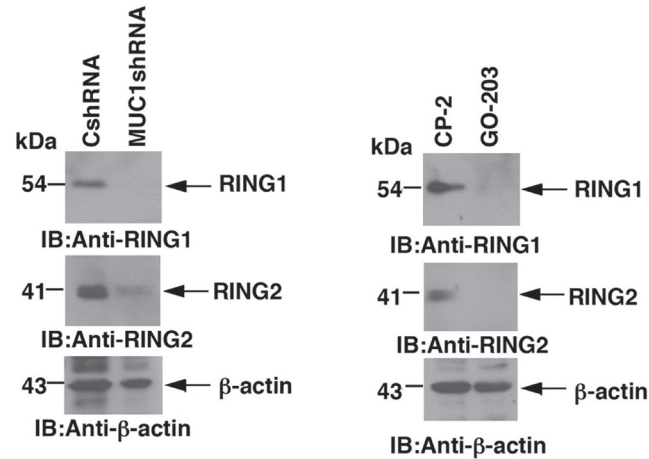

### B. U266

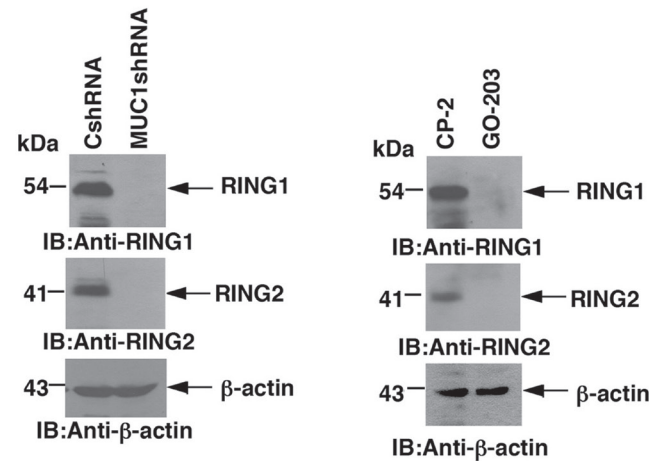

### C. NCIH929

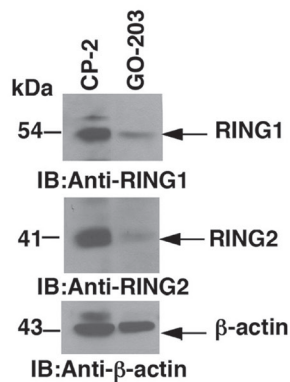

### D. OPM-2

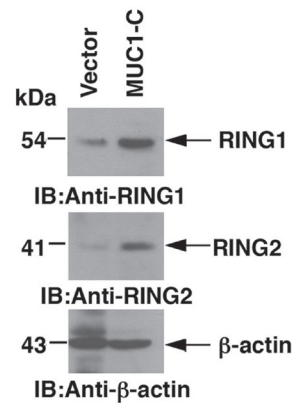

### Supplementary Figure 4: Targeting MUC1-C was associated with the downregulation of RING1 and RING2 levels.

(A-B) Lysates from KMS-12-PE (A) and U266 (B) cells stably expressing a control shRNA (CshRNA) or a MUC1 shRNA were immunoblotted with the indicated antibodies (left). Lysates from KMS-12-PE (A) and U266 (B) cells treated with CP-2 or GO-203 for 48 h were immunoblotted with the indicated antibodies (right). (C) Lysates from NCIH929 cells treated with CP-2 or GO-203 for 48 h were immunoblotted with the indicated antibodies. (D) OPM-2 cells transiently transfected to express an empty vector or one expressing MUC1-C were immunoblotted with the indicated antibodies.

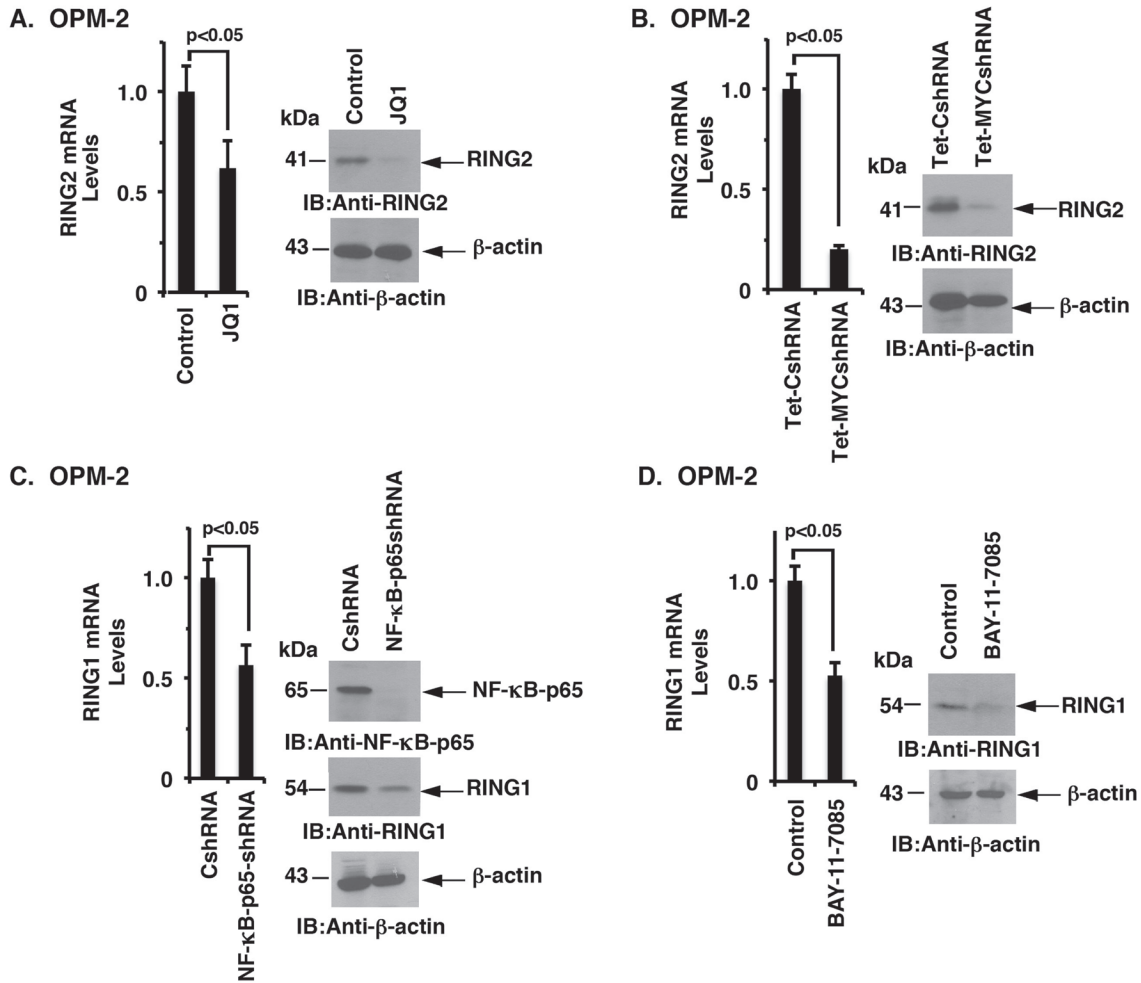

**Supplementary Figure 5: MUC1-C induces RING1 and RING2 expression.** (A) OPM-2 cells treated with JQ1 and vehicle control for 48 h were analyzed for RING2 mRNA levels by qRT-PCR (left). The results (mean±SD of 3 determinations) are expressed as relative mRNA levels as compared with that obtained for the control cells (assigned a value of 1). Lysates were immunoblotted with the indicated antibodies (right). (B) OPM-2/Tet-CshRNA and OPM-2/Tet-MYCshRNA cells treated with DOX for 5 d were analyzed for RING2 mRNA levels by qRT-PCR (left). The results (mean±SD of 3 determinations) are expressed as relative mRNA levels as compared with that obtained for the Tet-CshRNA cells (assigned a value of 1). Lysates were immunoblotted with the indicated antibodies (right). (C) OPM-2/CshRNA and OPM-2/NF-κB p65shRNA cells were analyzed for RING1 mRNA levels by qRT-PCR (left). The results (mean±SD of 3 determinations) are expressed as relative mRNA levels as compared with that obtained for the CshRNA cells (assigned a value of 1). Lysates were immunoblotted with the indicated antibodies (right). (D) OPM-2 cells treated with BAY-11-7085 or vehicle control for 24 h were analyzed for RING1 mRNA levels by qRT-PCR (left). The results (mean±SD of 3 determinations) are expressed as relative mRNA levels as compared with that obtained for the control cells (assigned a value of 1). Lysates were immunoblotted with the indicated antibodies (right).

**A. OPM-2**

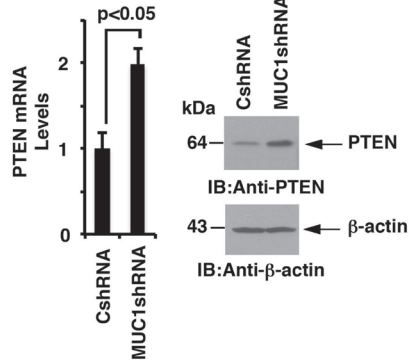

**B. RPMI8226**

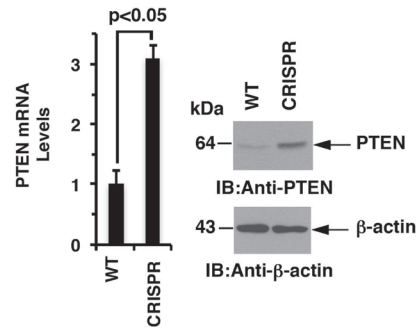

**C. OPM-2**

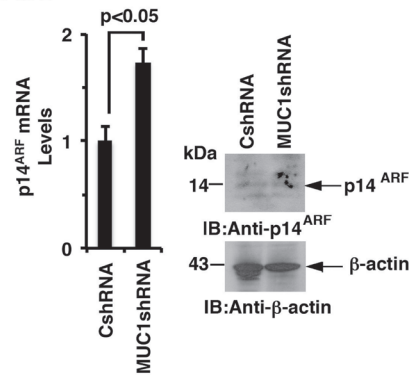

**D. OPM-2**

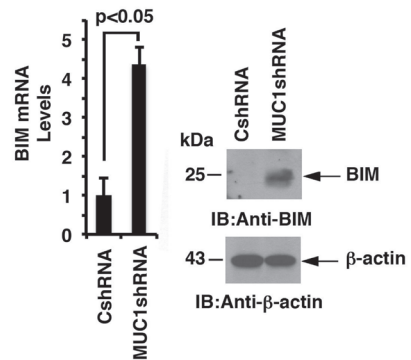

**Supplementary Figure 6: Targeting MUC1-C induces PTEN, p14<sup>ARF</sup> and BIM expression.** (A-D) The indicated cells were analyzed for mRNA levels by qRT-PCR (left). The results (mean±SD of 3 determinations) are expressed as relative mRNA levels as compared with that obtained for control cells (assigned a value of 1). Lysates were immunoblotted with the indicated antibodies (right).

**Supplementary Table 1: Primers used for qRT-PCR.**

|                |                                         |
|----------------|-----------------------------------------|
| MYC            | Fwd: 5'-AATGAAAAGGCCCCCAAGGTAGTTATCC-3' |
| MYC            | Rev: 5'-GTCGTTTCCGCAACAAGTCCTCTTC-3'    |
| BMI1           | Fwd: 5'-GGTACTTCATTGATGCCACAAC-3'       |
| BMI1           | Rev: 5'-TGCTGGGCATCGTAAGTATC-3'         |
| RING1          | Fwd: 5'-CCAGCAAAAACGTGGGAACTG-3'        |
| RING1          | Rev: 5'-GCAGAATCTGTGGAGGCACT-3'         |
| RING2          | Fwd: 5'-CTAAGGCCAGACCCAAACTT-3'         |
| RING2          | Rev: 5'-TGCTTGTTGATCCTGGCTAATA-3'       |
| PTEN           | Fwd: 5'-AAGGGACGAACTGGTGTAATG-3'        |
| PTEN           | Rev: 5'-GCCTCTGACTGGGAATAGTTA-3'        |
| p14ARF         | Fwd: 5'-GGTCGGGTAGAGGAGGT-3'            |
| p14ARF         | Rev: 5'-CCCATCATCATGACCTGGAT-3'         |
| BIM            | Fwd: 5'-CAGGCCTTCAACCACTATCTC-3'        |
| BIM            | Rev: 5'-AACTCTTGGGCGATCCATATC-3'        |
| $\beta$ -actin | Fwd: 5'-TTCTACAATGAGCTGCGTGTG-3'        |
| $\beta$ -actin | Rev: 5'-GGGGTGTGAAGGTCTCAAA-3'          |

**Supplementary Table 2: Primers used for ChIP qRT-PCR.**

|       |                                     |
|-------|-------------------------------------|
| BMI1  | Fwd: 5'-GGCCTGACTACACCGACACT-3'     |
| BMI1  | Rev: 5'-GCTGAAGGCAGAGTGGAAC-3'      |
| RING1 | Fwd: 5'-TCTTGTGTATGTCCCTGTTTCC-3'   |
| RING1 | Rev: 5'-AGCCATAGACTCGAGAATTGC-3'    |
| RING2 | Fwd: 5'-GGCCAAGGAGGTAGGAATAAAG-3'   |
| RING2 | Rev: 5'-AGTGTAATTGCTCCTGGGAAA-3'    |
| GAPDH | Fwd: 5'-TACTAGCGGTTTACGGGCG-3'      |
| GAPDH | Rev: 5'-TCGAACAGGAGGAGCAGAGAGCGA-3' |
